# Supplementary material for: Chemical affinity-assisted H2 isotope separation using Ca-rich onion-peel-derived nanoporous carbon composite
Source: Royal Society of Chemistry journal article supplement (doi:10.1039/d1qm00894c), 2021-01-01
Supplement: d1qm00894c1.pdf [file d1qm00894c1.pdf]

## **Chemical affinity assisted H<sub>2</sub> isotope separation using Ca-rich onion-peel-derived nanoporous carbon composite**

Raees Muhammad,<sup>a,†</sup> Suhwan Kim,<sup>a,†</sup> Jaewoo Park,<sup>a</sup> Minji Jung,<sup>a</sup> Myoung Eun Lee,<sup>b</sup> Jaewoo Chung,<sup>\* b</sup> Haenam Jang<sup>\* a,c</sup> and Hyunchul Oh,<sup>\* a,c</sup>

<sup>a</sup>Department of Energy Engineering, Gyeongsang National University, Jinju 52725, Republic of Korea

<sup>b</sup>Department of Environmental Engineering, Gyeongsang National University, Jinju 52725, Republic of Korea

<sup>c</sup>Future Convergence Technology Research Institute, Jinju 52725, Republic of Korea

Email\* [oh@gnu.ac.kr](mailto:oh@gnu.ac.kr) (Prof. Hyunchul Oh)

Email\* [jhn@gnu.ac.kr](mailto:jhn@gnu.ac.kr) (Prof. Haenam Jang)

Email\* [jwchung@gnu.ac.kr](mailto:jwchung@gnu.ac.kr) (Prof. Jaewoo Chung)

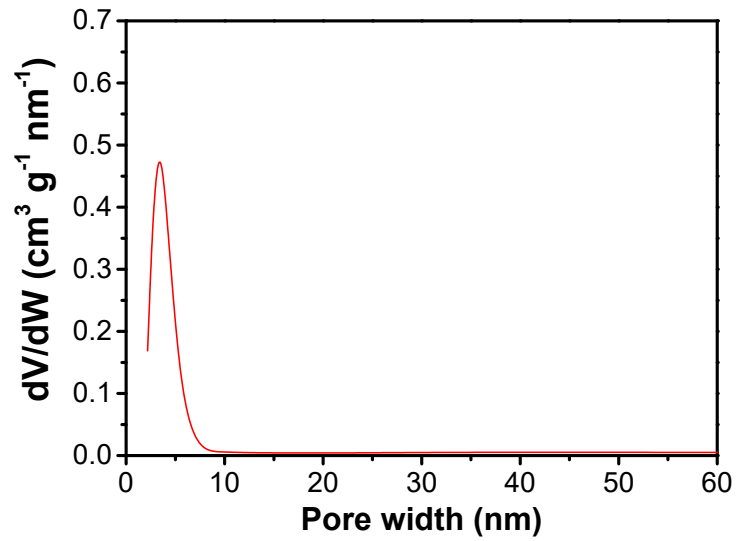

**Fig. S1.** Pore size distribution of OPC-AC.

**(c) SEM : Before activation**

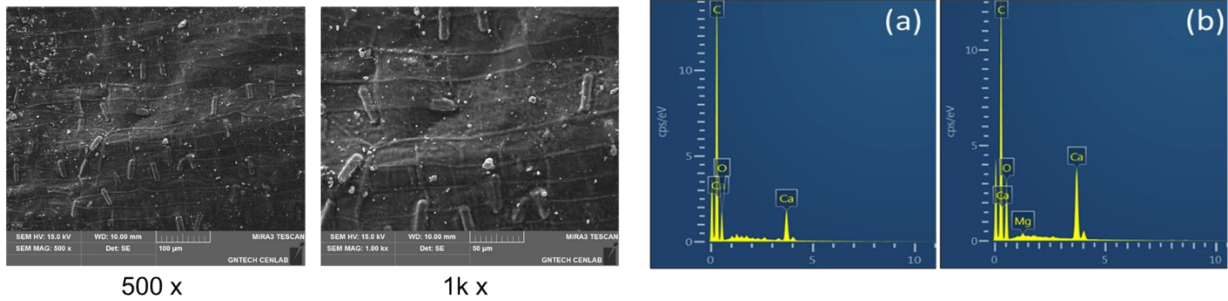

**(d) SEM : After activation**

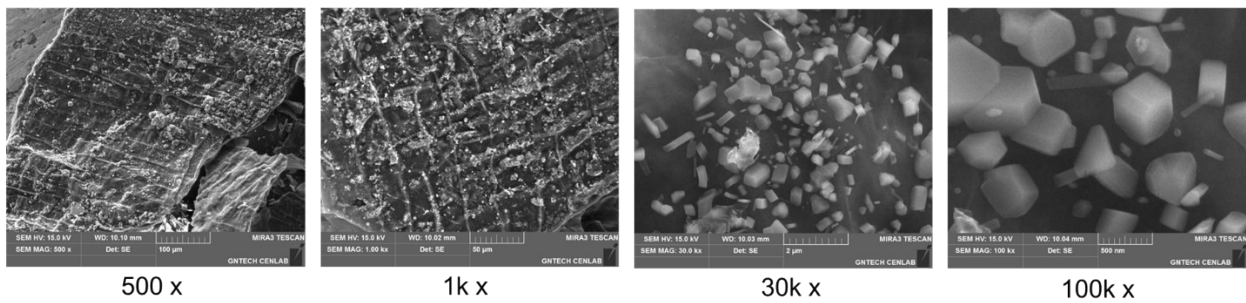

**Fig. S2.** Elemental analysis of (a) OPC and (b) OPC-AC, and SEM images (c) OPC and (d) OPC-AC

**Table S1** EDS Data of OPC and OPC-AC

| Sample | C [wt%] | O [wt%] | Ca [wt%] | Mg [wt%] | Total |
|--------|---------|---------|----------|----------|-------|
| OPC    | 73.95   | 19.66   | 6.39     | -        | 100   |
| OPC-AC | 52.16   | 30.25   | 17.24    | 0.34     | 100   |

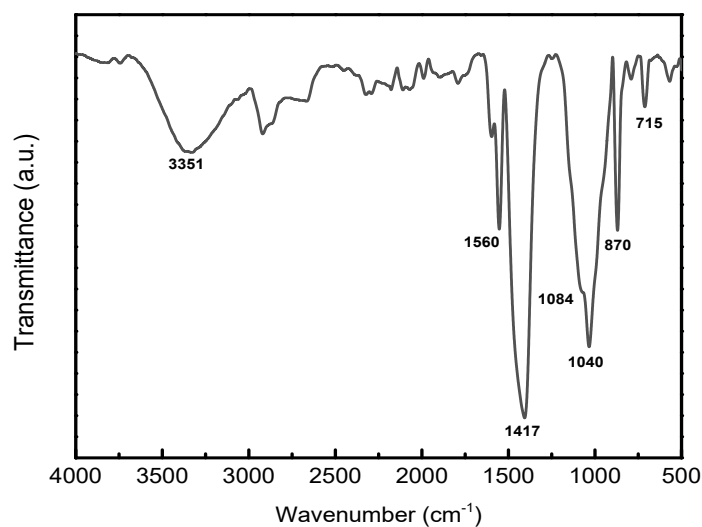

**Fig. S3.** FT-IR of OPC-AC.

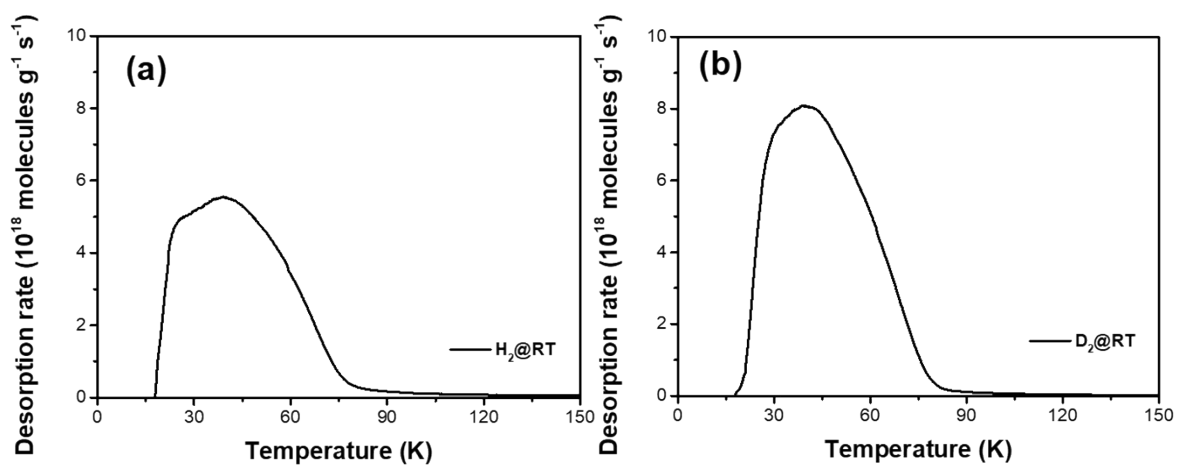

**Fig. S4.** Pure gas (a) H<sub>2</sub> and (b) D<sub>2</sub> thermal desorption spectra measured with heating rate of 3 K min<sup>-1</sup>

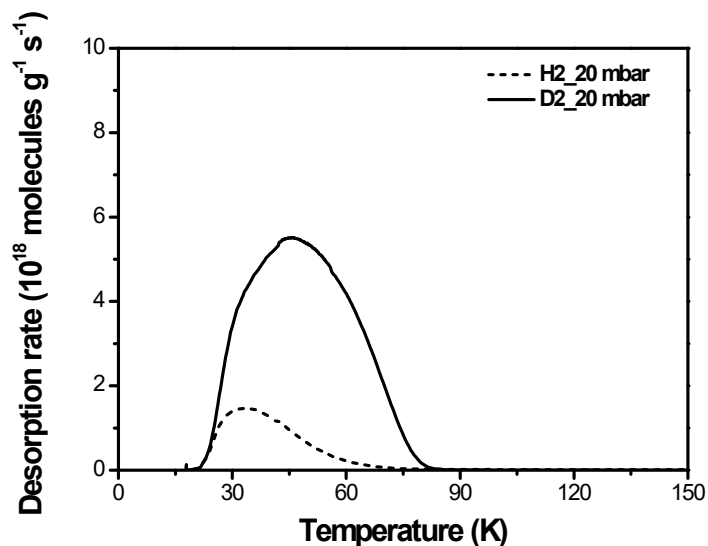

**Fig. S5.** D<sub>2</sub>/H<sub>2</sub> thermal desorption spectrum measured at 25 K with a heating rate of 3 K min<sup>-1</sup>.

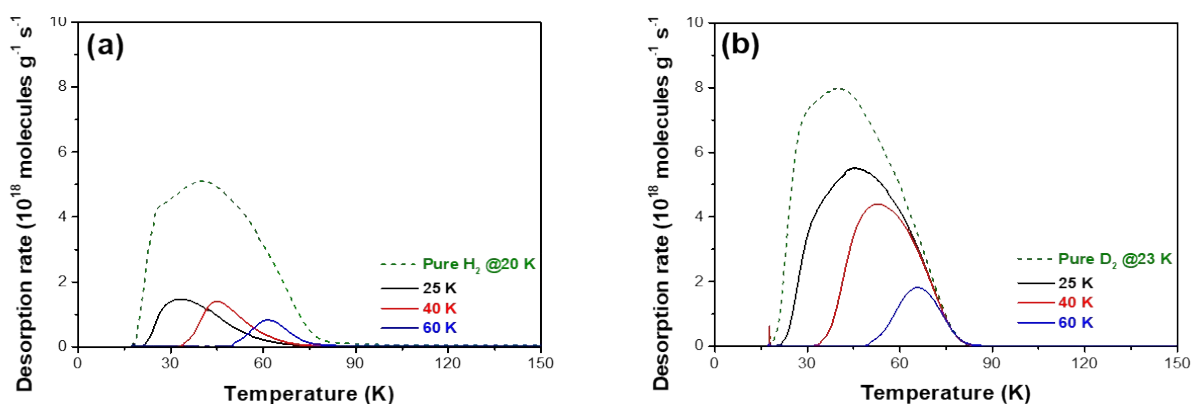

**Fig. S6.** Comparison of H<sub>2</sub> and D<sub>2</sub> desorbed amount when using pure gas and 1:1 mixture, respectively at various exposure temperatures: 25 K (black), 40 K (red), 60 K (blue), and pure H<sub>2</sub> and D<sub>2</sub> TDS (olive) for a comparison of gas uptake.

Note that one mixture measurement of TDS at a given  $T_{\text{exp}}$  provides each hydrogen and deuterium signal individually. The hydrogen (Figure S6a) and deuterium (Figure S6b) signals are presented separately to show temperature dependence. All olive dot-curves in Figure S6 imply the pure gas TDS (loading at room temperature and then cooling below 20 K; Figure S4), in which all adsorption sites are assumed to be accessible for both isotopes.

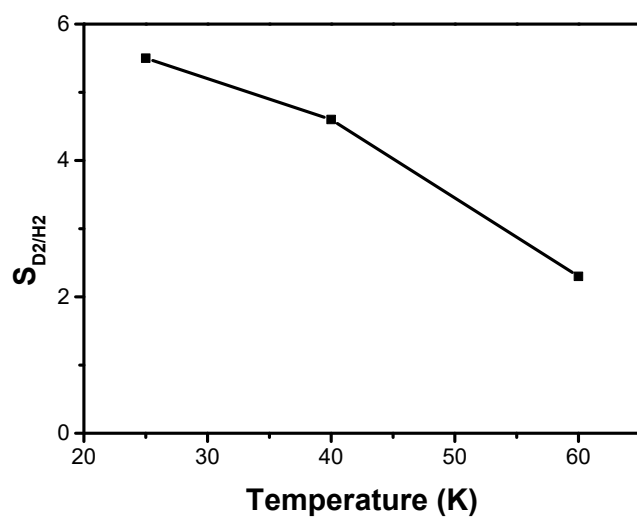

Fig. S7.  $S_{D_2/H_2}$  at 20 mbar and various exposure temperatures.

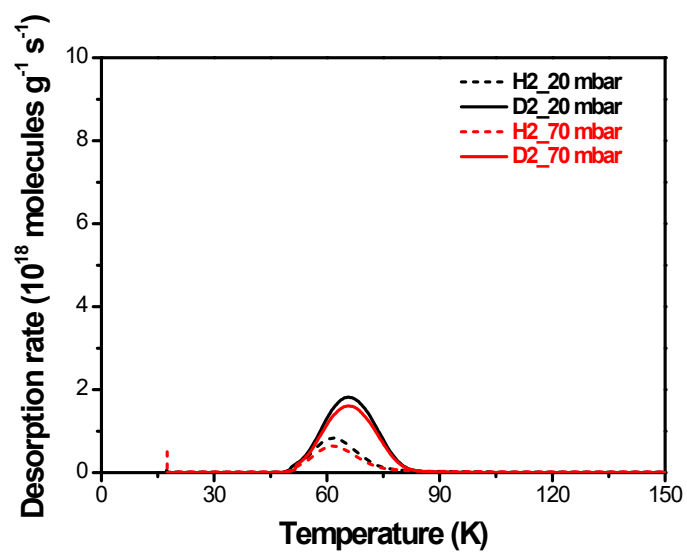

Fig. S8.  $D_2/H_2$  thermal desorption spectrum measured at 60 K with a heating rate of  $3 K min^{-1}$

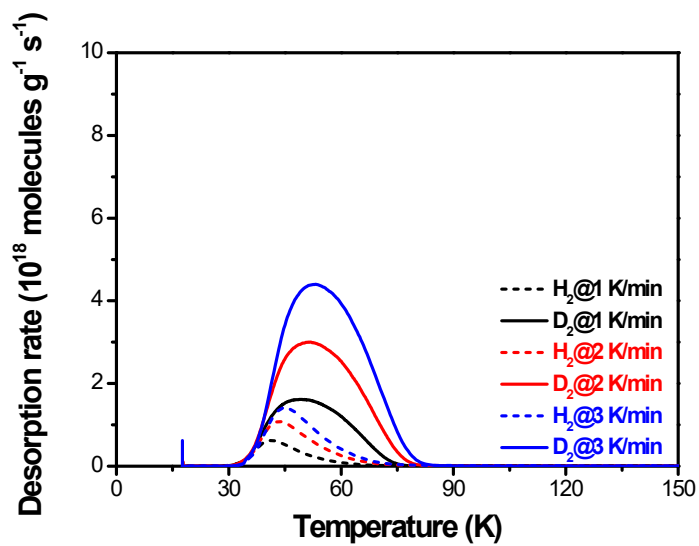

Fig. S9. D<sub>2</sub>/H<sub>2</sub> thermal desorption spectrum measured at different heating rates.
